# Supplementary material
Source: Research Square preprint supplement (doi:10.21203/rs.3.rs-9816794/v1)
Supplement: Supplementary file 1 [file 2a2d8155ce72eb673ae68b5f.docx]

Table S1. General information of the subjects with included lesions, lesion distribution and lesion types.

| Subject ID | Sex | Age (years) | Lesion location | Lesion size (length × short axis, mm) | Imaging diagnosis |
| --- | --- | --- | --- | --- | --- |
| 1 | Female | 62 | Left lateral superior segment (S2) | 4.70 × 8.76 | Cyst |
| 2 | Male | 58 | Right anterior superior segment (S8) | 9.38 × 4.98 | Cyst |
| 3 | Male | 61 | Left medial superior segment (S4a) | 10.03 × 8.88 | Cyst |
| 4 | Female | 71 | Right anterior superior segment (S8) | 44.52 × 42.19 | Cyst |
| 5 | Female | 56 | Right anterior inferior segment (S5) | 9.37 × 6.89 | Cyst |
| 6 | Female | 43 | Right posterior superior segment (S7) | 21.44 × 17.53 | Cyst |
| 7 | Female | 62 | Right posterior superior segment (S7) | 25.09 × 16.42 | Cyst |
| 8 | Male | 66 | Left lateral superior segment (S2) | 6.55 × 5.02 | Cyst |
| 9 | Female | 59 | Left medial superior segment (S4a) | 8.14 × 5.79 | Cyst |
| 10 | Female | 65 | Left medial superior segment (S4a) | 5.72 × 4.41 | Cyst |
| 11 | Female | 49 | Left medial superior segment (S4a) | 9.06 × 6.05 | Cyst |
| 12 | Female | 66 | Right anterior superior segment (S8) | 9.06 × 3.92 | Cyst |
| 13 | Female | 56 | Left medial superior segment (S4a) | 13.38 × 10.55 | Cyst |
| 14 | Female | 61 | Right posterior inferior segment (S6) | 6.09 × 6.55 | Cyst |
| 15 | Female | 56 | Left medial superior segment (S4a) | 6.08 × 8.03 | Cyst |
| 16 | Male | 63 | Right posterior inferior segment (S6) | 11.52 × 6.52 | Focal nodular hyperplasia (FNH) |
| 17 | Female | 59 | Right posterior superior segment (S7) | 5.87 × 5.30 | Cyst |
| 18 | Female | 62 | Left medial superior segment (S4a) | 7.99 × 5.13 | Cyst |

Note:The lesion site is typically described using the Couinaud segmentation system of the liver.
